# Supplementary material for: The Brassica oleracea genome reveals the asymmetrical evolution of polyploid genomes
Source: Springer Nature journal article supplement (doi:10.1038/ncomms4930), 2014-05-23
Supplement: ncomms4930-s1.pdf [file ncomms4930-s1.pdf]

The Brassica oleracea genome reveals the asymmetrical evolution of polyploid genomes | Nature Communications


Skip to main content

Thank you for visiting nature.com. You are using a browser version with limited support for CSS. To obtain
the best experience, we recommend you use a more up to date browser (or turn off compatibility mode in
Internet Explorer). In the meantime, to ensure continued support, we are displaying the site without styles
and JavaScript.

Advertisement

- View all journals
- Search
- My Account

  Login

- Explore content
- About the journal
- Publish with us

- Sign up for alerts
- RSS feed


1. nature
2. nature communications
3. articles
4. article

The *Brassica oleracea* genome reveals the asymmetrical evolution of polyploid genomes

Download PDF

Download PDF

- Article
- Open access
- Published: 23 May 2014

# The *Brassica oleracea* genome reveals the asymmetrical evolution of polyploid genomes

- Shengyi Liu1na1,
- Yumei Liu2na1,
- Xinhua Yang3na1,
- Chaobo Tong1na1,
- David Edwards4na1,
- Isobel A. P. Parkin5na1,
- Meixia Zhao1,6,
- Jianxin Ma6,
- Jingyin Yu1,
- Shunmou Huang1,
- Xiyin Wang7,8,
- Junyi Wang3,
- Kun Lu9,
- Zhiyuan Fang2,
- Ian Bancroft10,
- Tae-Jin Yang11,
- Qiong Hu1,
- Xinfa Wang1,
- Zhen Yue3,
- Haojie Li12,
- Linfeng Yang3,
- Jian Wu2,
- Qing Zhou3,
- Wanxin Wang2,
- Graham J King13,
- J. Chris Pires14,
- Changxin Lu3,
- Zhangyan Wu3,
- Perumal Sampath11,
- Zhuo Wang3,
- Hui Guo7,
- Shengkai Pan3,
- Limei Yang2,
- Jiumeng Min3,
- Dong Zhang7,
- Dianchuan Jin8,
- Wanshun Li3,
- Harry Belcram15,
- Jinxing Tu16,
- Mei Guan17,
- Cunkou Qi18,
- Dezhi Du19,
- Jiana Li9,
- Liangcai Jiang12,
- Jacqueline Batley20,
- Andrew G Sharpe21,
- Beom-Seok Park22,
- Pradeep Ruperao4,
- Feng Cheng2,
- Nomar Espinosa Waminal11,23,
- Yin Huang3,
- Caihua Dong1,
- Li Wang8,
- Jingping Li7,
- Zhiyong Hu1,
- Mu Zhuang2,
- Yi Huang1,
- Junyan Huang1,
- Jiaqin Shi1,
- Desheng Mei1,
- Jing Liu1,
- Tae-Ho Lee7,
- Jinpeng Wang8,
- Huizhe Jin7,
- Zaiyun Li16,
- Xun Li17,
- Jiefu Zhang18,
- Lu Xiao19,
- Yongming Zhou16,
- Zhongsong Liu17,
- Xuequn Liu24,
- Rui Qin24,
- Xu Tang7,
- Wenbin Liu3,
- Yupeng Wang7,
- Yangyong Zhang2,
- Jonghoon Lee11,
- Hyun Hee Kim23,
- France Denoeud25,26,
- Xun Xu3,
- Xinming Liang3,
- Wei Hua1,
- Xiaowu Wang2,
- Jun Wang3,27,28,29,
- Boulos Chalhoub15 &
- …
- Andrew H Paterson7

Show authors

*Nature Communications*
**volume 5**, Article number: 3930 (2014)
Cite this article

- 48k Accesses
- 733 Citations
- 23 Altmetric
- Metrics details

### Subjects

- Genome evolution
- Polyploidy in plants

## Abstract

Polyploidization has provided much genetic variation for plant adaptive evolution, but the mechanisms by which the molecular evolution of polyploid genomes establishes genetic architecture underlying species differentiation are unclear. *Brassica* is an ideal model to increase knowledge of polyploid evolution. Here we describe a draft genome sequence of *Brassica oleracea*, comparing it with that of its sister species *B. rapa* to reveal numerous chromosome rearrangements and asymmetrical gene loss in duplicated genomic blocks, asymmetrical amplification of transposable elements, differential gene co-retention for specific pathways and variation in gene expression, including alternative splicing, among a large number of paralogous and orthologous genes. Genes related to the production of anticancer phytochemicals and morphological variations illustrate consequences of genome duplication and gene divergence, imparting biochemical and morphological variation to *B. oleracea*. This study provides insights into *Brassica* genome evolution and will underpin research into the many important crops in this genus.


### Similar content being viewed by others

### Genome structural evolution in Brassica crops

Article
27 May 2021

### Musa balbisiana genome reveals subgenome evolution and functional divergence

Article
Open access
15 July 2019

### Large-scale gene expression alterations introduced by structural variation drive morphotype diversification in Brassica oleracea

Article
Open access
13 February 2024

## Introduction

B*rassica oleracea* comprises many important vegetable crops including cauliflower, broccoli, cabbages, Brussels sprouts, kohlrabi and kales. The species demonstrates extreme morphological diversity and crop forms, with various members grown for their leaves, flowers and stems. About 76 million tons of *Brassica* vegetables were produced in 2010, with a value of 14.85 billion dollars ( http://faostat.fao.org/). Most *B. oleracea* crops are high in protein1 and carotenoids2, and contain diverse glucosinolates (GSLs) that function as unique phytochemicals for plant defence against fungal and bacterial pathogens3 and on consumption have been shown to have potent anticancer properties4,5,6.

*B. oleracea* is a member of the family *Brassicaceae* (~\n338 genera and 3,709 species)7 and one of three diploid *Brassica* species in the classical triangle of U8 that also includes diploids *B. rapa* (AA) and *B. nigra* (BB) and allotetraploids *B. juncea* (AABB), *B. napus* (AACC) and *B. carinata* (BBCC). These allotetraploid species are important oilseed crops, accounting for 12% of world edible oil production ( http://faostat.fao.org/). As the origin and relationship between these species is clear, the timing and nature of the evolutionary events associated with *Brassica* divergence and speciation can be revealed by interspecific genome comparison. Each of the *Brassica* genomes retains evidence of recursive whole-genome duplication (WGD) events9,10 (Supplementary Fig. 1) and have undergone a *Brassiceae*-lineage-specific whole-genome triplication (WGT)11,12 since their divergence from the *Arabidopsis* lineage. These events were followed by diploidization that involved substantial genome reshuffling and gene losses11,12,13,14,15. Because of this, *Brassica* species are a model for the study of polyploid genome evolution (Supplementary Fig. 2), mechanisms of duplicated gene loss, neo- and sub-functionalization, and associated impact on morphological diversity and species differentiation.

We report a draft genome sequence of *B. oleracea* and its comprehensive genomic comparison with the genome of sister species *B. rapa*, which diverged from a common ancestor ~\n4 MYA. These data provide insights into the dynamics of *Brassica* genome evolution and divergence, and serve as important resources for *Brassica* vegetable and oilseed crop breeding. Furthermore, this genome will support studies of the large range of morphological variation found within *B. oleracea*, which includes sexually compatible crops such as cabbages, cauliflower and broccoli that are important for their economic, nutritional and potent anticancer value.

## Results

### *B. oleracea* genome assembly and annotation

Complementing the sequencing of the smaller *B. rapa* genome11, a draft genome assembly of *B. oleracea* var. *capitata* line 02–12 was produced by interleaving Illumina, Roche 454 and Sanger sequence data. This assembly represents 85% of the estimated 630 Mb genome, and includes >98% of the gene space (Supplementary Methods, Supplementary Tables 1–3, 7 and 8 and Supplementary Fig. 3). The assembly was anchored to a new genetic map16 to produce nine pseudo-chromosomes that account for 72% of the assembly, and validated by comparison with a *B. oleracea* physical map17, a high-density *B. napus* genetic map18 and complete BAC sequences (Supplementary Figs 4–9 and Supplementary Tables 4 and 5). For comparative analyses, identical genome annotation pipelines were used for annotation of protein-coding genes and transposable elements (TEs) for *B. oleracea* and *B. rapa*.

A total of 45,758 protein-coding genes were predicted, with a mean transcript length of 1,761 bp, a mean coding length of 1,037 bp, and a mean of 4.55 exons per gene (Table 1, Supplementary Methods, Supplementary Table 6 and Supplementary Fig. 10), similar to *A. thaliana*19 and *B. rapa*11. Publicly available ESTs, together with RNA sequencing (RNA-seq) data generated in this study, support 94% of predicted gene models (Supplementary Tables 7 and 8), and 91.6% of predicted genes have a match in at least one public protein database (Supplementary Tables 9 and 10, and Supplementary Fig. 11). Of the 45,758 predicted genes, 13,032 produce alternative splicing (AS) variants with intron retention and exon skipping (Supplementary Table 11). Genome annotation also predicted 3,756 non-coding RNAs (miRNA, tRNA, rRNA and snRNA) (Supplementary Table 12).

**Table 1 Summary of genome assembly and annotation of *B. oleracea*.**

Full size table

A combination of structure-based analyses and homology-based comparisons resulted in the identification of 13,382 TEs with clearly identified terminal boundaries, including 5,107 retrotransposons and 8,275 DNA transposons (Supplementary Methods, Supplementary Fig. 12 and Supplementary Table 13). These elements together with numerous truncated elements or TE remnants make up 38.80% of the assembled portion of the *B. oleracea* genome, whereas TEs account for only 21.47% of the *B. rapa* genome assembly. Copia (11.64%) and gypsy (7.84%) retroelements are the major constituents of the repetitive fraction, and are unevenly distributed across each chromosome, with retrotransposons predominantly found in pericentromeric or heterochromatic regions (Supplementary Fig. 13) in *B. oleracea*. Tentative physical positions of some of the centromeres were determined based on homologue and phylogenetic analysis of the centromere-specific 76 bp tandem repeats CentBo-1 and CentBo-2 and copia-type retrotransposon (CentCRBo) (Supplementary Table 14 and Supplementary Figs 14–17). The distribution of 45S and 5S rDNA sequences were also visualized by fluorescent *in situ* hybridization (Supplementary Figs 18 and 19), leading to a predicted karyotype ideogram for *B. oleracea* (Supplementary Fig. 20). An extra-centromeric locus with colocalized centromeric satellite repeat CentBo-1 and the centromeric retrotransposon CRBo-1 was observed on the long arm of chromosome 6 (Supplementary Figs 18–20). A comprehensive database for the genome information is accessible at http://www.ocri-genomics.org/bolbase/index.html.

### Conserved syntenic blocks and genome rearrangement after WGT

The relatively complete triplicated regions in *B. oleracea* and *B. rapa* were constructed and they relate to the 24 ancestral crucifer blocks (A–X) in *A. thaliana*20. Further the triplicated blocks resulting from WGT in the two *Brassica* species were partitioned into three subgenomes: LF (Least-fractionated), MF1 (Medium-fractionated) and MF2 (Most-fractionated)11 (Fig. 1a, Supplementary Methods, Supplementary Tables 15 and 16, and Supplementary Figs 21–26). These syntenic blocks occupy the majority of the genome assemblies of *A. thaliana* (19,628 genes, 72.24% of 27,169 genes), *B. oleracea* (26,485 genes, 57.88%) and *B. rapa* (26,698 genes, 64.84%), and provide a foundation for comparative analyses of chromosomal rearrangement, gene loss and divergence of retained paralogues after WGT. Massive gene loss occurred in an asymmetrical and reciprocal fashion in the three subgenomes of each species and was largely completed before the *B. oleracea–B. rapa* divergence (Fig. 1c, Supplementary Tables 17–19 and Supplementary Figs 25–27). The timing of this evolutionary process was supported by the estimated timing of WGT ~\n15.9 million years ago (MYA), and species divergence ~\n4.6 MYA, based on synonymous substitution (Ks) rates of genes located in the blocks (Fig. 1b and Supplementary Table 20). Gene loss occurred mainly through small deletions that may be caused by illegitimate recombination21,22 (Supplementary Fig. 27), consistent with observations in other plant genomes.

**Figure 1: Genomic structure and gene retention rates in syntenic regions of *B. oleracea* and *B. rapa*.**

(**a**) Segmental colinearity of the genomes of *B. oleracea*, *B. rapa* and *A. thaliana*. Syntenic blocks are defined and labelled from A to X (coloured) previously reported in *A. thaliana*20. (**b**) Time estimate of WGD and subsequent two *Brassica* species divergence. (**c**) Pattern of retention/loss of orthologous genes on each set of three subgenomic (LF, MF1 and MF2) blocks of *B. oleracea* and *B. rapa* corresponding to *A. thaliana* A to X blocks. The *x* axis denotes the physical position of each *A. thaliana* gene locus. The *y* axis denotes the proportion of orthologous genes retained in the *B. oleracea* and *B. rapa* subgenomic blocks around each *A. thaliana* gene, where 500 genes flanking each side of a certain gene locus were analysed, giving a total window size of 1,001 genes.

Full size image

Abundant genome rearrangement following WGT and subsequent *Brassica* species divergence resulted in complex mosaics of triplicated ancestral genomic blocks in the A and C genomes (Fig. 1a and Supplementary Fig. 28). At least 19 major, and numerous fine-scale, chromosome rearrangements occurred, which differentiate the two *Brassica* species (Supplementary Fig. 29). This is in agreement with previous comparative studies based on chromosome painting12,23 and genetic mapping24,25. The extensive chromosome reshuffling in *Brassica* is in contrast to that observed in other taxa, such as the highly syntenic tomato–potato and pear–apple genomes, each with longer divergence times and less genome rearrangement26,27. This difference may be a consequence of mesopolyploidy in *Brassica*.

### Greater TEs accumulation in *B. oleracea* than *B. rapa*

Both retro- (22.13%) and DNA (16.67%) TEs appear to be greater amplified in *B. oleracea* relative to *B. rapa* (9.43 and 12.04%) (Fig. 2a and Supplementary Table 13). We constructed 1,362 gap-free contig-contig syntenic regions by clustering orthologous *B. rapa*—*B. oleracea* genes using MCscan (Supplementary Figs 29 and 30). The *B. oleracea* TE length (34.03% of the 259.6M) is 3.4 times greater than that of the syntenic *B. rapa* regions (16.73% of the 155.0M) (Fig. 2c, Supplementary Tables 21 and 22, and Supplementary Fig. 31). Phylogenetic analysis revealed that *B. oleracea* has both more LTR retrotransposon (LTR-RT) families, and more members in most families than *B. rapa* (Fig. 2d and Supplementary Figs 12, 32 and 33). Furthermore, two new lineages of LTR-RTs, *Brassica Copia* Retrotransposon and *Brassica Gypsy* Retrotransposon, were defined in both *Brassica* species (Supplementary Fig. 33). Analysis of LTR insertion time revealed that ~\n98% of *B. oleracea* intact LTR-RTs amplified continuously over the ~\n4 million years (MY) since the *B. oleracea*–*B. rapa* split, whereas ~\n68% of *B. rapa* intact LTR-RTs amplified rapidly within the last 1 MY, predominantly in the recent 0.2 MY (Fig. 2b and Supplementary Fig. 34). Hence, LTR-RTs expanded more in the intergenic space of euchromatic regions in *B. oleracea* than *B. rapa*. This agrees with previous observations based on comparison of BAC sequences between the A and C genomes28. As a consequence of continuous TE amplification over the last 4 MY, the genome size of *B. oleracea* is ~\n30% larger than that of *B. rapa* although the two genomes share the same ploidy and are largely collinear.

**Figure 2: TE comparison analyses in *B. oleracea* and *B. rapa.***

(**a**) TE copy number and total length in each assembly and *B. oleracea–B. rapa* syntenic blocks. (**b**) The number of intact LTR (*Copia*-like and *Gypsy*-like) birthed at different times (million years ago, MYA) in the syntenic regions of *B. oleracea* and *B. rapa*. (**c**) The comparison of TE distribution and composition in *B. oleracea–B. rapa* syntenic blocks along *B. oleracea* chromosomes. We divided *B. oleracea–B. rapa* syntenic region into non-overlapping sliding 200 kb windows to compare TE contents. For each window, the ratio log10(*B. oleracea/B. rapa*) was calculated for total syntenic block length (blue line), LTR length (purple line), gene length (yellow point), exons length (red point) and intron length (green point). If *B. oleracea* > *B. rapa* in absolute length of TE composition in a compared window, the dot or line is above the line *y*=0. The corresponding *B. rapa* chromosome segments along *B. oleracea* C08 were indicated by coloured bars. All other *B. oleracea* chromosomes are showed in Supplementary Fig. 31. (**d**) Phylogeny of the Copia-like elements as an example of LTR-RTs of the syntenic regions in *B. rapa* and *B. oleracea*. The neighbor-joining (*NJ*) trees were generated based on the conserved RT domain nucleotide sequences using the Kimura two-parameter method68 in MEGA4 (ref. 69).

Full size image

### Species-specific genes and tandemly duplicated genes

While the genomes of *B. oleracea* and *B. rapa* are highly similar in terms of total gene clusters/sequences and the gene number in each cluster, there are also a large number of species-specific genes in the two species. A total of 66.5% (34,237 genes) of *B. oleracea* genes and 74.9% (34,324) of *B. rapa* genes were clustered into OrthoMCL groups (Supplementary Table 23 and Supplementary Fig. 35). We identified 9,832 *B. oleracea*-specific and 5,735 *B. rapa*-specific genes, of which 77% were supported by gene expression and/or a clear *Arabidopsis* homologue (Supplementary Table 24). Of them, >90% of these specific genes were validated for their absence in the counterpart genomes by reciprocal mapping of raw clean reads (Supplementary Tables 25 and 26). Most *Brassica*-specific genes are randomly distributed along the chromosomes (Supplementary Figs 36 and 37). More than 80% of the species-specific genes were surrounded by non-specific genes (Supplementary Fig. 38), suggesting that deletion of individual genes may be the major mechanism underlying gene loss and the difference in gene numbers between *B. oleracea* and *B. rapa*.

Tandem duplication produces clusters of duplicated genes and contributes to the expansion of gene families29. We identified 1,825, 2,111 and 1,554 gene clusters containing 4,365, 5,181 and 4,170 tandemly duplicated genes in *B. oleracea*, *B. rapa* and *A. thaliana*, respectively (Fig. 3a, Supplementary Tables 27 and 28 and Supplementary Fig. 39). The wide range of sequence divergence of tandem gene pairs in each species suggests that tandem gene duplication occurred continuously throughout the evolutionary history of these species, rather than in discrete bursts (Supplementary Figs 40 and 41). Their continuous and asymmetrical occurrence after species divergence resulted in 522, 697 and 815 species-specific tandem clusters in the three genomes. The frequency of tandem duplication is independent of the total gene content, suggesting that genome triplication has not inhibited its occurrence. Tandemly duplicated genes are preferentially enriched for gene ontology (GO) categories related to defence response and pathways related to secondary metabolism such as indole alkaloid biosynthesis and tropane, piperidine and pyridine alkaloid biosynthesis (Fig. 3b, Supplementary Tables 29–32 and Supplementary Fig. 42). Over 44.0 and 51.9% of the NBS-encoding resistance genes are tandemly duplicated in *B. oleracea* and *B. rapa*, respectively (Supplementary Table 33).

**Figure 3: The duplicated genes derived from tandem duplication and whole-genome duplications in *Brassica* genomes.**

(**a**) A Venn diagram showing shared and specific tandem duplication events in *A. thaliana*, *B. rapa* and *B. oleracea*. (**b**,**c**) Distribution of tandem genes and WGT/WGD-derived paralogues in the KEGG pathway maps in *B. oleracea* (bol), *B. rapa* (bra) and *A. thaliana* (ath). For each KEGG pathway map, the proportion of the number of duplicated genes or paralogues to the total genes was calculated (*x* axis) and the number of maps whose tandem gene proportion fell in a range was shown on the *y* axis. (**d**) Oxidative phosphorylation pathway enriched by WGT-derived paralogous genes in the *Brassica* genomes. The gene copy number for each KO enzyme in *B. oleracea*, *B. rapa* and *A. thaliana* were shown (dash-connected) under the KO enzyme number.

Full size image

### Biased loss and retention of genes after WGT/WGD

Following polyploidization, reversion of gene numbers towards diploid levels through gene loss has been widely observed in plants30. However, in *Brassica* this only appears to be true for collinear genes in the conserved syntenic regions, with a loss of ~\n60% of the predicted post-triplication gene set, nearly restoring the pre-triplication gene number. This is reflected in an overall retention rate of 1.2-fold of *A. thaliana* orthologous genes in corresponding syntenic regions (Fig. 1c and Supplementary Table 18). In contrast, in terms of genes that have no collinear gene in *A. thaliana* and either *Brassica* species (hereafter called non-collinear genes), gene retention rates is 2.5-fold the *A. thaliana* gene number in *B. oleracea* and 1.9-fold in *B. rapa*, both significantly higher than the expected rates (*P* value <2.2e–16;Supplementary Table 34). For these retained genes, the numbers of the genes that are common in the two *Brassica* species are 11,746 in *B. oleracea* and 10,411 in *B. rapa*. Most of these genes are supported by expression and/or the presence of an *Arabidopsis* homologue (Supplementary Table 35). More than 61% of these genes have homologues present as collinear genes and 16% also are homologous to other non-collinear genes, indicating gene movement from triplicated syntenic regions and being similar to observations in *A. thaliana*, where half of the genes are nonsyntenic within rosids31. This suggests that the breakdown of the triplicated syntenic relationship has not only prevented gene loss and a move towards pre-triplication gene numbers but has also maintained a higher gene density, and thus maintained WGT-derived genes for species evolution.

The presence of a large number of the retained paralogous genes in the syntenic regions led us to examine whether genes in some functional categories have preferentially been over-retained, as observed in other plants29. The results indicate that WGT-produced paralogous genes are over-retained in GO categories associated with regulation of metabolic and biosynthetic processes, RNA metabolism and transcription factors (Supplementary Table 36 and Supplementary Figs 43–45), and the two *Brassica* species exhibit similar patterns of gene category retention. From a study of KEGG pathways, we also found that WGT-produced *Brassica* paralogous genes contribute 40–60% of total genes for 90% of KEGG pathways (Fig. 3c and Supplementary Fig. 43), and are functionally enriched in primary or core metabolic processes such as oxidative phosphorylation, carbon fixation, photosynthesis, circadian rhythm32 and lipid metabolism (Supplementary Tables 36 and 37 and Supplementary Figs 43–45). Notably, the pathways associated with energy metabolism have been enhanced in both *Brassica* species. For instance, in the oxidative phosphorylation pathway, there are 161 genes in *A. thaliana*, but 241 in *B. oleracea* and 208 in *B. rapa*. The majority (143/241 and 142/208) of these *Brassica* genes are multiple paralogues residing in the triplicated syntenic regions, and more than half of these paralogues have been retained as three copies, significantly higher than observed for other genes in the triplication regions (Fig. 3d and Supplementary Fig. 43).

Phylogenetic analyses show that WGT led to an expansion of genes involved in auxin functioning (AUX, IAA, GH3, PIN, SAUR, TAA, TIR, TPL and YUCCA), morphology specification (TCP), and flowering time control (FLC, CO, VRN1, LFY, AP1 and GI) (Supplementary Table 38 and Supplementary Figs 46–61), and that most *Arabidopsis* genes in these families have two or three orthologs in *Brassica* species. These WGT-produced duplicated genes may provide important sources of evolutionary innovation33 and contribute to the extreme morphological diversity in *Brassica* species.

### Divergence of duplicated genes in the *Brassica* genomes

The largest genetic foundation for plant genome evolution and new species formation is the differentiation of retained paralogous and orthologous genes. Around 38% (4,302/11,493) of all paralogous gene pairs in *B. oleracea* and ~\n36% (4,089/11,448) in *B. rapa* have different predicted exon numbers (Supplementary Data 1, Supplementary Tables 39 and 40 and Supplementary Fig. 62). There are 6,571 orthologous gene pairs with different exon numbers, accounting for 27.6% of total gene pairs (23,823). Some paralogous or orthologous pairs have high Ks values and low sequence similarity (Supplementary Fig. 63), indicating sequence differentiation. Of these paralogous genes, some offer appreciable opportunity for non-reciprocal DNA exchanges (gene conversion). About 8% of the 4,296 homologous quartets in *B. rapa* and *B. oleracea* have been affected by gene conversion (Fig. 4a, Supplementary Table 41 and Supplementary Fig. 64) and about one-sixth (53) of converted genes were inferred to have experienced independent conversion events in both *Brassica* species, a parallelism sometimes observed in other plants11,34. Around 40–44% of conversion events involved paralogues in the less-fractionated subgenomes LF in both species, substantially higher than the other two subgenomes (Supplementary Table 41). This finding suggests that gene conversion is related to homologous gene density, which determines the likelihood of illegitimate recombination.

**Figure 4: Divergence of *Brassica* paralogous and orthologous genes in *B. oleracea* and *B. rapa*.**

(**a**) Genome-wide gene conversion in *B. oleracea*. The conversion in *B. rapa* is showed in Supplementary Fig. 64. (**b**) The ratio of differentially expressed duplicated gene pairs derived from different duplications: alpha whole-genome duplication (α-WGD), *Brassiceae*-lineage WGT, tandem duplication (TD). Bol, *B. oleracea*; Bra, *B. rapa*. C: callus; R: root; St: stem; L: leaf; F: flower; Si: silique. The differentially expressed duplicated gene pairs were defined as fold change >2 and false discovery rate (FDR) <0.05 or gene pair where expression was detected for only one gene within gene pairs (FDR <0.05). (**c**) Box and whisker plots for differentiated expression for three subgenomes (LF, MF1 and MF2) in flower tissue of *B. oleracea* and *B. rapa*. For the other tissues, see Supplementary Fig. 67. (**d**) The duplicated gene pairs belonging to transcription factors (TFs) and its related GO terms contain a significantly lower ratio of differentially expressed duplicated gene pairs than the average at the genome-wide level in leaf (values given) and other tissues (values not presented) (Supplementary Table 45). (**e**) The GO terms (left) in which the duplicated gene pairs contain a significantly higher ratio of differentially expressed duplicated gene pairs than the average ratio at the genome-wide level in leaf and other tissues (Supplementary Table 46). Values from one tissue were presented and the other tissues were indicated with abbreviated letters to the right if expression in these tissues is significantly higher. (**f**) Expression variation caused by divergence (either different variants or differential expression of the same variants) of alternative splicing (AS) variants in WGT paralogous gene pairs with identical numbers of exons and in Bol–Bra orthologous gene pairs. IRES denotes types of intron retention and exon skipping.

Full size image

Analysis of RNA-seq data generated from callus, root, leaf, stem, flower and silique of *B. oleracea* and *B. rapa* suggests that >40% of WGT paralogous gene pairs are differentially expressed in these species (Fig. 4b and Supplementary Fig. 65), suggesting potential subfunctionalization of these genes. In both species, a general trend of expression differentiation was alpha-WGD paralogous genes (~\n46%) > WGT paralogous genes (~\n42%) > tandemly duplicated genes (~\n35%) (Fig. 4b, Supplementary Fig. 66 and Supplementary Tables 42 and 43). Different tissues harbour approximately the same number of differentially expressed duplicates, but this number was slightly higher in flower tissue. The expression level of genes in the LF subgenome was significantly higher than corresponding syntenic genes in the more fractionated subgenomes (MF1 and MF2) while no expression dominance relationship was observed between the subgenomes MF1 and MF2 (Fig. 4c, Supplementary Table 44 and Supplementary Fig. 67). Duplicated transcription factor gene pairs showed less differentiated expression (~\n38%) than the expected ratio at the genome-wide level (Fig. 4d and Supplementary Table 45), while paralogues with GO categories related to membrane, catalytic activity and defence response exhibited a higher ratio of differentiated expression (Fig. 4e and Supplementary Table 46). Of *B. oleracea–B. rapa* orthologous gene pairs (23,823 in total), ~\n42% were differentially expressed across all tissues (Supplementary Tables 42 and 43).

Furthermore, many paralogues generate different transcripts, resulting in expression differentiation. Analysis of AS variants of paralogous gene pairs that have identical numbers of exons demonstrated that these variants (either different variants or differential expression of the same variants) cause >20% and >44% of such paralogous genes to be differentially expressed in *B. oleracea* and *B. rapa*, respectively (Fig. 4f and Supplementary Table 47). For orthologous gene pairs of *B. oleracea* and *B. rapa*, 35.5% (8,467) of gene pairs showed differential expression due to AS variation. When only counting intron retention and exon skipping, 9.3% (2,215) of gene pairs differ. Divergence in AS variants of gene pairs presents an important layer of gene regulation, as reported35,36,37,38, and thus provides a genetic basis for species evolution and new species formation.

### Unique GSLs metabolism pathways

GSLs and hydrolysis products have been of long-standing interest due to their role in plant defence and anticancer properties. Compared with *B. rapa* and *B. napus*, *B. oleracea* has the greatest GSL profile diversity, with wide qualitative and quantitative variation39,40. We identified 101 and 105 GSL biosynthesis genes in *B. rapa* and *B. oleracea*, respectively, and 22 GSL catabolism genes in each species (Fig. 5a, Supplementary Table 48 and Supplementary Data 2). In the GSL biosynthesis and catabolism pathways, tandem genes (41.4%, 40.7% and 33.9% in *A. thaliana*, *B. oleracea* and *B. rapa*, respectively) were present in a much higher proportion than the genome-wide average (Supplementary Table 32). The observed variation of GSL profiles is mainly attributed to the duplication of two genes, *methylthioalkylmalate* (*MAM*) *synthase* and *2-oxoglutarate-dependent dioxygenase* (*AOP*).

**Figure 5: Whole-genome-wide comparison of genes involved in glucosinolate metabolism pathways in *B. oleracea* and its relatives.**

(**a**) Aliphatic and indolic GSL biosynthesis and catabolism pathways in *A. thaliana*, *B. oleracea* and *B. rapa*. The copy number of GSL biosynthetic genes in *A. thaliana*, *B. rapa* and *B. oleracea* are listed in square brackets, respectively. Potential anticancer substances/precursors are highlighted in blue bold. Two important amino acid chain elongation and side-chain modification loci *MAMs* and *AOP2* are highlighted in red bold, within the number in the green bracket representing the number of non-functional genes. (**b**,**c**) The neighbour-joining (NJ) trees of MAM and AOP genes were generated based on the aligned coding sequences and 100 bootstrap repeats. The silenced genes are indicated by red hollow circle, expressed functional genes are represented by red solid disc and green rectangle. In *A. thaliana* ecotype Columbia there are just MAM1 and MAM3. (**d**) Three *B. oleracea AOP2* loci among which are one functional *AOP2* and two mutated *AOP2*. 1MOI3M: 1-methoxyindol-3-ylmethyl GSL; 1OHI3M: 1-hydroxyindol-3-ylmethyl GSL; 3MSOP: 3-methylsulfinylpropyl GSL; 3MTP: 3-methylthiopropyl GSL; 3PREY: 2-Propenyl GSL; 4BTEY: 3-butenyl GSL; 4MOI3M: 4-methoxyindol-3-ylmethyl GSL; 4OHB, 4-hydroxybutyl GSL; 4OHI3M: 4-hydroxyindol-3-ylmethyl GSL; 4MSOB: 4-methylsulfinylbutyl GSL; 4MTB, 4-methylthiobutyl GSL; AITC: allyl isothiocyanate; I3C: indole-3-carbinol; I3M: indolyl-3-methyl GSL; DIM: 3,3′-diindolymethane; MAM: methylthioalkylmalate; AOP: 2-oxoglutarate-dependent dioxygenase.

Full size image

In *Arabidopsis*, the *MAM* family contains three tandemly duplicated and functionally diverse members (*MAM1*, *MAM2* and *MAM3*), and functional analysis demonstrated that MAM2 (absent in ecotype Columbia) and MAM1 catalyses the condensation reaction of the first and the first two elongation cycles for the synthesis of dominant 3 and 4 carbon (C) side-chain aliphatic GSLs, respectively40,41, while MAM3 is assumed to contribute to the production of all GSL chain lengths42. In *B. rapa* and *B. oleracea*, *MAM1*/*MAM2* genes experienced independent tandem duplication to produce 6 and 5 orthologs respectively (Fig. 5b,c). The main GSLs in *B. oleracea* are 4C and 3C GSLs (progoitrin, gluconapin, glucoraphanin and sinigrin)43, while those in *B. rapa* are 4C and 5C GSLs (gluconapin and glucobrassicanapin)39 (Fig. 5a). Based on the results of expression and phylogenetic analyses, we found a pair of genes Bol017070 and Bra013007, which are the only orthologous genes showing high expression in *B. oleracea* but silenced in *B. rapa* (Fig. 5a). This expression difference most likely leads to greater accumulation of the 3C GSL anticancer precursor sinigrin in *B. oleracea*. Meanwhile, the expression level of MAM3 in *B. rapa* is much higher than in *B. oleracea*, explaining the accumulation of 5C GSL glucobrassicanapin in *B. rapa*. Other genes affecting specific anticancer GLS products are *AOPs.* Previously, research has reported four gene loci involved in the side-chain modifications of aliphatic GSLs in *Arabidopsis*. Two tandemly duplicated genes *AOP2* and *AOP3* catalyse the formation of alkenyl and hydroxyalkyl GSLs, respectively. When both *AOPs* are non-functional, the plant accumulates the precursor methylsulfinyl alkyl GSL. We identified three *AOP2* genes in *B. oleracea* (Fig. 5d), but two are non-functional due to the presence of premature stop codons. In contrast, all three *AOP2* copies are functional in *B. rapa*44. No *AOP3* homologue has been identified in *Brassica*. This analysis supports GSL content surveys and explains why glucoraphanin is abundant in *B. oleracea*, but not in *B. rapa*.

## Discussion

The *Brassica* genomes experienced WGT11,12,25 followed by massive gene loss and frequent reshuffling of triplicated genomic blocks. Analysis of retained or lost genes following triplication identified over-retention of genes for metabolic pathways such as oxidative phosphorylation, carbon fixation, photosynthesis and circadian rhythm32, which may contribute to polyploid vigour45. Fewer lost genes were observed in the less-fractionated subgenome, possibly due to expression dominance as reported in maize46.

Gene expression analysis revealed extensive divergence and AS variants between duplicate genes. This subfunctionalization or neofunctionalization of duplicated genes provides genetic novelty and a basis for species evolution and new species formation. For example, TF genes that are considered to be conserved still have more than 38% of paralogous pairs showing differential expression across tissues although this percentage is lower than the average from all duplicated genes. Gene expression variation may contribute to an increased complexity of regulatory networks after polyploidization.

The multi-layered asymmetrical evolution of the *Brassica* genomes revealed in this study suggests mechanisms of polyploid genome evolution underlying speciation. Asymmetrical gene loss between the *Brassica* subgenomes, the asymmetrical amplification of TEs and tandem duplications, preferential enrichment of genes for certain pathways or functional categories, and divergence in DNA sequence and expression, including alternative splicing among a large number of paralogous and orthologous genes, together shape a route for genome evolution after polyploidization. A molecular model of polyploid genome evolution through these asymmetrical mechanisms is summarized in Supplementary Fig. 2. The additional information of accessible large datasets and resource was provided in Supplementary Table 49.

In summary, the *B. oleracea* genomic sequence, its features in comparison with its relatives, and the genome evolution mechanisms revealed, provide a fundamental resource for the genetic improvement of important traits, including components of GSLs for anticancer pharmaceuticals. The genome sequence has also laid a foundation for investigation of the tremendous range of morphological variation in *B. oleracea* as well as supporting genome analysis of the important allotetraploid crop *B. napus* (canola or rapeseed).

## Methods

### Sample preparation and genome sequencing

A *B. oleracea* sp. *capitata* homozygous line 02–12 with elite agronomic characters and widely used as a parent in hybrid breeding was used for the reference genome sequencing (Supplementary Methods). The seedlings of plants were collected and genomic DNA was extracted from leaves with a standard CTAB extraction method. Illumina Genome Analyser whole-genome shotgun sequencing combined with GS FLX Titanium sequencing technology was used to achieve a *B. oleracea* draft genome. We constructed a total of 35 paired-end sequencing libraries with insertion sizes of 180 base pairs (bp), 200 bp, 350 bp, 500 bp, 650 bp, 800 bp, 2 kb, 5 kb, 10 kb and 20 kb following a standard protocol provided by Illumina (Supplementary Methods). Sequencing was performed using Illumina Genome Analyser II according to the manufacturer’s standard protocol.

### Genome assembly and validation

We took a series of checking and filtering measures on reads following the Illumina-Pipeline, and low-quality reads, adaptor sequences and duplicates were removed (Supplementary Methods). The reads after the above filtering and correction steps were used to perform assembly including contig construction, scaffold construction and gap filling using SOAPdenovo1.04 ( http://soap.genomics.org.cn/) (Supplementary Methods). Finally, we used 20-kb-span paired-end data generated from the 454 platform and 105-kb-span BAC-end data downloaded from NCBI ( http://www.ncbi.nlm.nih.gov/nucgss?term=BOT01) to extend scaffold length (Supplementary Methods). The *B. oleracea* genome size was estimated using the distribution curve of 17-mer frequency (Supplementary Methods).

To anchor the assembled scaffolds onto pseudo-chromosomes, we developed a genetic map using a double haploid population with 165 lines derived from a F1 cross between two homozygous lines 02–12 (sequenced) and 0188 (re-sequenced). The genetic map contains 1,227 simple sequence repeat markers and single nucleotide polymorphism markers in nine linkage groups, which span a total of 1,180.2 cM with an average of 0.96 cM between the adjacent loci16. To position these markers to the scaffolds, marker primers were compared with the scaffold sequences using e-PCR (parameters -n2 -g1 –d 400–800), with the best-scoring match chosen in case of multiple matches.

We validated the *B. oleracea* genome assembly by comparing it with the published physical map constructed using 73,728 BAC clones ( http://lulu.pgml.uga.edu/fpc/WebAGCoL/brassica/WebFPC/)17 and a genetic map from *B. napus*18 (Supplementary Methods). Eleven Sanger-sequenced *B. oleracea* BAC sequences were used to assess the assembled genome using MUMmer-3.22 ( http://mummer.sourceforge.net/) (Supplementary Methods).

### Gene prediction and annotation

Gene prediction was performed on the genome sequence after pre-masking for TEs (Supplementary Methods). Gene prediction was processed with the following steps: (i) *De novo* gene prediction used AUGUSTUS47 and GlimmerHMM48 with parameters trained from *A. thaliana* genes. (ii) For homologue prediction, we mapped the protein sequences from *A. thaliana*, *O. sativa*, *C. papaya*, *V. vinifera* and *P. trichocarpa* to the *B. oleracea* genome using tblastn with an *E*-value cutoff of 10−5, and used GeneWise (Version 2.2.0)49 for gene annotation. (iii) For EST-aided annotation, the *Brassica* ESTs from NCBI were aligned to the *B. oleracea* genome using BLAT (identity ⩾0.95, coverage ⩾0.90) and further assembled using PASA50. Finally, all the predictions were combined using GLEAN51 to produce the consensus gene sets.

Functional annotation of *B. oleracea* genes was based on comparison with SwissProt, TrEMBL, Interproscan and KEGG proteins databases. The tRNA genes were identified by tRNAscan-SE using default parameters52. Then rRNAs were compared with the genome using blastn. Other non-coding RNAs, including miRNA, snRNA, were identified using INFERNAL53 by comparison with the Rfam database.

### TE annotation

LTR-RTs were initially identified using the LTR\_STRUC54 programme, and then manually annotated and checked based on structure characteristics and sequence homology. Refined intact elements were then used to identify other intact elements and solo LTRs55. All the LTR-RTs with clear boundaries and insertion sites were classified into superfamilies (*Copia*-like, *Gypsy*-like and Unclassified retroelements) and families relying on the internal protein sequence, 5′, 3′ LTRs, primer-binding site and polypurine tracts. Non-LTR-RTs (Long interspersed nuclear element, LINE and Short interspersed nuclear element, SINE) and DNA transposons (*Tc1-Mariner*, *hAT*, *Mutator*, *Pong*, *PIF-Harbinger*, CACTA and miniature inverted repeat TE) were identified using conserved protein domains of reverse transposase or transposase as queries to search against the assembled genome using tblastn. Further upstream and downstream sequences of the candidate matches were compared with each other to define their boundaries and structure56. *Helitron* elements were identified by the HelSearch 1.0 programme57 and manually inspected. All the TE categories were identified according to the criteria described previously58. Typical elements of each category were selected and mixed together as a database for RepeatMasker59 analysis. Around 20 × coverage of shotgun reads randomly sampled from the two *Brassica* genomes were masked by the same TE data set to confirm the different accumulation of TEs between the two genomes.

### Syntenic block construction of *B. oleracea* and its relatives

We used the same strategy as described in the *B. rapa* genome paper11 to construct syntenic blocks between species (Supplementary Methods). The all-against-all blastp comparison (*E*-value ≤ 1e–5) provided the gene pairs for syntenic clustering determined by MCScan (MATCH\_SCORE: 50, MATCH\_SIZE: 5, GAP\_SCORE: –3, E\_VALUE: 1E–05). As applied in *B. rapa*11, we assigned and partitioned multiple *B. oleracea* or *B. rapa* chromosomal segments that matched the same *A. thaliana* segment (‘A to X’ numbering system in *A. thaliana*22) into three subgenomes: LF, MF1 and MF2.

### OrthoMCL clustering

To identify and estimate the number of potential orthologous gene families between *B. oleracea*, *B. rapa*, *A. thaliana*, *C. papaya*, *P. trichocarpa*, *V. vinifera*, *S. bicolor* and *O. sativa*, and also between *B. oleracea* and *B. rapa*, we applied the OrthoMCL pipeline60 using standard settings (blastp *E* value <1 × 10−5 and inflation factor =1.5) to compute the all-against-all similarities.

### Phylogenetic analysis of gene families

We performed comparative analysis of trait-related gene families. Genes from grape, papaya and *Arabidopsis* were downloaded from the GenoScope database ( http://www.genoscope.cns.fr/externe/GenomeBrowser/Vitis/), the Hawaii Papaya Genome Project ( http://asgpb.mhpcc.hawaii.edu/papaya/), and the Arabidopsis Information Resource ( http://www.arabidopsis.org/). Previously reported *Arabidopsis* and *Brassica* gene sequences were downloaded from TAIR ( http://www.arabidopsis.org/) and BRAD ( http://brassicadb.org/brad/). The protein sequences of the genes were used to determine homologues in grape, papaya, *Arabidopsis*, *B. oleracea* and *B. rapa* by performing blast comparisons with an *E*-value 1e–10. The Clustal61 programs were used for multiple sequence alignment. Alignment of the small family of GI genes was performed using MEGA562 to conduct neighbour-joining analysis with default parameters and subjected to careful manual checks to remove highly divergent sequences from further analysis. While for other genes, often found in families of tens of genes, the phylogenetic analysis were performed by PhyML63, which can accommodate quite divergent sequences by implementing a maximal likelihood approach with initial analysis based on neighbour-joining method. During these analyses, we constructed trees using both CDS and protein sequence, and the protein-derived tree was used to show the phylogeny if not much incongruity was found. Bootstrapping was performed using 100 repetitive samplings for each gene family. All the inferred trees were displayed using MEGA5 (ref. 62). The multiple sequence alignment of these families was provided as Supplementary Data 3.

### Differential expression of duplicated genes across tissues

RNA-seq reads were mapped to their respective locations on the reference genome using Tophat64. Uniquely aligned read counts were calculated for each gene for each tissue sample. We performed the exact conditional test of two Poisson rates on read counts of duplicated genes to test the differential expression of duplicated genes, according to the method applied in soybean65,66. For each duplicated gene pair (for example, genes A and B), read counts and gene length were denoted as Ea and La for gene A, and Eb and Lb for gene B, respectively. The read counts of the genes A and B were assumed to follow the Poisson distributions with rates *λA*=Ra × La and *λB*=Rb × Lb. Under the null hypothesis of equal expression of the genes A and B, that is, Ra=Rb, the conditional distribution of Ea given Ea+Eb=*k* follows a binomial distribution with success probability *P*=λa/(λa+λb)=La/(La+Lb). The *P* values were computed and further adjusted to maintain the false discovery rate at 0.05 across gene pairs using the Benjamini–Hochberg method67.

### Statistical analysis

The average number of all retained orthologues in the three subgenomes was used to estimate the expected retained gene number in each block, and used together with the observed retained gene number, for the gene retention disparity statistics using the *χ*2 test. In the GO, IPR (Interproscan) or KEGG enrichment analyses of WGT or tandem genes, the *χ*2 test (*N*>5) or the Fisher’s exact test (*N*≤5) was used to detect significant differences between the proportion of (WGT or tandem) genes observed in each child GO, IPR or KEGG categories, and the expected overall proportion of (WGT or tandem) genes in the whole genome. Correlation of the gene numbers of WGT-derived paralogous genes with tandem genes in 938 GO terms was tested by Pearson correlation coefficients (Supplementary Figure 68). The Benjamini–Hochberg false discovery rate was performed to adjust the *P* values67.

## Additional information

**Accession codes:** Genome sequence data for *B. oleracea* have been deposited in the DDBJ/EMBL/GenBank nucleotide core database under the accession code AOIX00000000. Transcriptome sequence data for *B. rapa and B. oleracea* have been deposited in the DDBJ/EMBL/GenBank Sequence Read Archive (SRA) under the accession codes GSEhttp://www.ncbi.nlm.nih.gov/nuccore/?term=43245 and GSE42891 respectively.

**How to cite this article:** Liu, S. *et al*. The *Brassica oleracea* genome reveals the asymmetrical evolution of polyploid genomes. *Nat. Commun.* 5:3930 doi: 10.1038/ncomms4930 (2014).

## Accession codes

### Accessions

#### GenBank/EMBL/DDBJ

- 42891

## References

1. U.S. Department of Agriculture, Agricultural Research Service. USDA National Nutrient Database for Standard Reference, Release 26-Vegetables and Vegetable Products. (2013).
2. Kopsell, D. A. & Kopsell, D. E. Accumulation and bioavailability of dietary carotenoids in vegetable crops. *Trends Plant Sci.* **11**, 499–507 (2006).

   Article 
   CAS 
   Google Scholar
3. Halkier, B. A. & Gershenzon, J. Biology and biochemistry of glucosinolates. *Annu. Rev. Plant Biol.* **57**, 303–333 (2006).

   Article 
   CAS 
   Google Scholar
4. Khwaja, F. S., Wynne, S., Posey, I. & Djakiew, D. 3,3'-diindolylmethane induction of p75NTR-dependent cell death via the p38 mitogen-activated protein kinase pathway in prostate cancer cells. *Cancer Prev. Res. (Phila)* **2**, 566–571 (2009).

   Article 
   Google Scholar
5. Li, Y. et al. Sulforaphane, a dietary component of broccoli/broccoli sprouts, inhibits breast cancer stem cells. *Clin. Cancer Res.* **16**, 2580–2590 (2010).

   Article 
   CAS 
   Google Scholar
6. Higdon, J. V., Delage, B., Williams, D. E. & Dashwood, R. H. Cruciferous vegetables and human cancer risk: epidemiologic evidence and mechanistic basis. *Pharmacol Res.* **55**, 224–236 (2007).

   Article 
   CAS 
   Google Scholar
7. Warwick, S. I., Francis, A. & Al-Shehbaz, I. A. Brassicaceae: species checklist and database on CD-Rom. *Pl. Syst. Evol.* **259**, 249–258 (2006).

   Article 
   Google Scholar
8. Nagaharu, U. Genome analysis in *Brassica* with special reference to the experimental formation of *B. napus* and peculiar mode of fertilication. *Jap. J. Bot.* **7**, 389–452 (1935).

   Google Scholar
9. Bowers, J. E., Chapman, B. A., Rong, J. & Paterson, A. H. Unravelling angiosperm genome evolution by phylogenetic analysis of chromosomal duplication events. *Nature* **422**, 433–438 (2003).

   Article 
   CAS 
   ADS 
   Google Scholar
10. Jiao, Y. et al. Ancestral polyploidy in seed plants and angiosperms. *Nature* **473**, 97–100 (2011).

    Article 
    CAS 
    ADS 
    Google Scholar
11. Wang, X. et al. The genome of the mesopolyploid crop species *Brassica rapa*. *Nat. Genet.* **43**, 1035–1039 (2011).

    Article 
    CAS 
    Google Scholar
12. Lysak, M. A., Koch, M. A., Pecinka, A. & Schubert, I. Chromosome triplication found across the tribe Brassiceae. *Genome Res.* **15**, 516–525 (2005).

    Article 
    CAS 
    Google Scholar
13. Cheng, F. et al. Deciphering the diploid ancestral genome of the Mesohexaploid *Brassica rapa*. *Plant Cell* **25**, 1541–1554 (2013).

    Article 
    CAS 
    Google Scholar
14. Town, C. D. et al. Comparative genomics of *Brassica oleracea* and *Arabidopsis thaliana* reveal gene loss, fragmentation, and dispersal after polyploidy. *Plant Cell* **18**, 1348–1359 (2006).

    Article 
    CAS 
    Google Scholar
15. Mun, J. H. et al. Genome-wide comparative analysis of the *Brassica rapa* gene space reveals genome shrinkage and differential loss of duplicated genes after whole genome triplication. *Genome Biol.* **10**, R111 (2009).

    Article 
    Google Scholar
16. Wang, W. et al. Construction and analysis of a high-density genetic linkage map in cabbage (*Brassica oleracea* L. *var. capitata*). *BMC Genomics* **13**, 523 (2012).

    Article 
    CAS 
    Google Scholar
17. Wang, X. et al. A physical map of *Brassica oleracea* shows complexity of chromosomal changes following recursive paleopolyploidizations. *BMC Genomics* **12**, 470 (2011).

    Article 
    CAS 
    Google Scholar
18. Bancroft, I. et al. Dissecting the genome of the polyploid crop oilseed rape by transcriptome sequencing. *Nat. Biotechnol.* **29**, 762–766 (2011).

    Article 
    CAS 
    Google Scholar
19. Arabidopsis Genome and Initiative. Analysis of the genome sequence of the flowering plant *Arabidopsis thaliana*. *Nature* **408**, 796–815 (2000).
20. Schranz, M. E., Lysak, M. A. & Mitchell-Olds, T. The ABC’s of comparative genomics in the Brassicaceae: building blocks of crucifer genomes. *Trends Plant Sci.* **11**, 535–542 (2006).

    Article 
    CAS 
    Google Scholar
21. Woodhouse, M. R. et al. Following tetraploidy in maize, a short deletion mechanism removed genes preferentially from one of the two homologs. *PLoS Biol.* **8**, e1000409 (2010).

    Article 
    Google Scholar
22. Devos, K. M., Brown, J. K. & Bennetzen, J. L. Genome size reduction through illegitimate recombination counteracts genome expansion in *Arabidopsis*. *Genome Res.* **12**, 1075–1079 (2002).

    Article 
    CAS 
    Google Scholar
23. Lysak, M. A., Cheung, K., Kitschke, M. & Bures, P. Ancestral chromosomal blocks are triplicated in Brassiceae species with varying chromosome number and genome size. *Plant Physiol.* **145**, 402–410 (2007).

    Article 
    CAS 
    Google Scholar
24. Panjabi, P. et al. Comparative mapping of *Brassica juncea* and *Arabidopsis thaliana* using Intron Polymorphism (IP) markers: homoeologous relationships, diversification and evolution of the A, B and C *Brassica* genomes. *BMC Genomics* **9**, 113 (2008).

    Article 
    Google Scholar
25. Parkin, I. A. et al. Segmental structure of the *Brassica napus* genome based on comparative analysis with *Arabidopsis thaliana*. *Genetics* **171**, 765–781 (2005).

    Article 
    CAS 
    Google Scholar
26. Wu, J. et al. The genome of the pear (*Pyrus bretschneideri* Rehd.). *Genome Res.* **23**, 396–408 (2012).

    Article 
    Google Scholar
27. The Tomato Genome Consortium. The tomato genome sequence provides insights into fleshy fruit evolution. *Nature* **485**, 635–641 (2012).
28. Cheung, F. et al. Comparative analysis between homoeologous genome segments of *Brassica napus* and its progenitor species reveals extensive sequence-level divergence. *Plant Cell* **21**, 1912–1928 (2009).

    Article 
    CAS 
    Google Scholar
29. Freeling, M. Bias in plant gene content following different sorts of duplication: tandem, whole-genome, segmental, or by transposition. *Annu. Rev. Plant Biol.* **60**, 433–453 (2009).

    Article 
    CAS 
    Google Scholar
30. Sankoff, D., Zheng, C. & Zhu, Q. The collapse of gene complement following whole genome duplication. *BMC Genomics* **11**, 313 (2010).

    Article 
    Google Scholar
31. Woodhouse, M. R., Tang, H. & Freeling, M. Different gene families in *Arabidopsis thaliana* transposed in different epochs and at different frequencies throughout the rosids. *Plant Cell* **23**, 4241–4253 (2011).

    Article 
    CAS 
    Google Scholar
32. Lou, P. et al. Preferential retention of circadian clock genes during diploidization following whole genome triplication in *Brassica rapa*. *Plant Cell* **24**, 2415–2426 (2012).

    Article 
    CAS 
    Google Scholar
33. Doyle, J. J. et al. Evolutionary genetics of genome merger and doubling in plants. *Annu. Rev. Genet.* **42**, 443–461 (2008).

    Article 
    CAS 
    Google Scholar
34. Wang, X., Tang, H. & Paterson, A. H. Seventy million years of concerted evolution of a homoeologous chromosome pair, in parallel, in major Poaceae lineages. *Plant Cell* **23**, 27–37 (2011).

    Article 
    Google Scholar
35. Syed, N. H., Kalyna, M., Marquez, Y., Barta, A. & Brown, J. W. Alternative splicing in plants--coming of age. *Trends Plant Sci.* **17**, 616–623 (2012).

    Article 
    CAS 
    Google Scholar
36. Gabut, M. et al. An alternative splicing switch regulates embryonic stem cell pluripotency and reprogramming. *Cell* **147**, 132–146 (2011).

    Article 
    CAS 
    Google Scholar
37. Zhang, P. G., Huang, S. Z., Pin, A. L. & Adams, K. L. Extensive divergence in alternative splicing patterns after gene and genome duplication during the evolutionary history of *Arabidopsis*. *Mol. Biol. Evol.* **27**, 1686–1697 (2010).

    Article 
    CAS 
    Google Scholar
38. Filichkin, S. A. et al. Genome-wide mapping of alternative splicing in *Arabidopsis thaliana*. *Genome Res.* **20**, 45–58 (2010).

    Article 
    CAS 
    Google Scholar
39. Yang, B. & Quiros, C. F. Survey of glucosinolate variation in leaves of *Brassica rapa* crops. *Genet. Res. Crop Evol.* **57**, 1079–1089 (2010).

    Article 
    CAS 
    Google Scholar
40. Benderoth, M., Pfalz, M. & Kroymann, J. Methylthioalkylmalate synthases: genetics, ecology and evolution. *Phytochem. Rev.* **8**, 255–268 (2009).

    Article 
    CAS 
    Google Scholar
41. Benderoth, M. et al. Positive selection driving diversification in plant secondary metabolism. *Proc. Natl. Acad. Sci. USA* **103**, 9118–9123 (2006).

    Article 
    CAS 
    ADS 
    Google Scholar
42. Textor, S., de Kraker, J. W., Hause, B., Gershenzon, J. & Tokuhisa, J. G. MAM3 catalyses the formation of all aliphatic glucosinolate chain lengths in *Arabidopsis*. *Plant Physiol.* **144**, 60–71 (2007).

    Article 
    CAS 
    Google Scholar
43. Volden, J. et al. Processing (blanching, boiling, steaming) effects on the content of glucosinolates and antioxidant related parameters in cauliflower (*Brassica oleracea* L. *ssp. botrytis*). *LWT Food Sci. Technol.* **42**, 63–73 (2009).

    Article 
    CAS 
    Google Scholar
44. Wang, H. et al. Glucosinolate biosynthetic genes in *Brassica rapa*. *Gene* **487**, 135–142 (2011).

    Article 
    CAS 
    Google Scholar
45. Chen, Z. J. Molecular mechanisms of polyploidy and hybrid vigour. *Trends Plant Sci.* **15**, 57–71 (2010).

    Article 
    CAS 
    Google Scholar
46. Schnable, J. C., Springer, N. M. & Freeling, M. Differentiation of the maize subgenomes by genome dominance and both ancient and ongoing gene loss. *Proc. Natl. Acad. Sci. USA* **108**, 4069–4074 (2011).

    Article 
    CAS 
    ADS 
    Google Scholar
47. Stanke, M., Steinkamp, R., Waack, S. & Morgenstern, B. AUGUSTUS: a web server for gene finding in eukaryotes. *Nucleic Acids Res.* **32**, W309–W312 (2004).

    Article 
    CAS 
    Google Scholar
48. Majoros, W. H., Pertea, M. & Salzberg, S. L. TigrScan and GlimmerHMM: two open source ab initio eukaryotic gene-finders. *Bioinformatics* **20**, 2878–2879 (2004).

    Article 
    CAS 
    Google Scholar
49. Birney, E., Clamp, M. & Durbin, R. GeneWise and Genomewise. *Genome Res.* **14**, 988–995 (2004).

    Article 
    CAS 
    Google Scholar
50. Xu, Y., Wang, X., Yang, J., Vaynberg, J. & Qin, J. PASA—a program for automated protein NMR backbone signal assignment by pattern-filtering approach. *J. Biomol. NMR* **34**, 41–56 (2006).

    Article 
    Google Scholar
51. Elsik, C. G. et al. Creating a honey bee consensus gene set. *Genome Biol.* **8**, R13 (2007).

    Article 
    Google Scholar
52. Lowe, T. M. & Eddy, S. R. tRNAscan-SE: a program for improved detection of transfer RNA genes in genomic sequence. *Nucleic Acids Res.* **25**, 955–964 (1997).

    Article 
    CAS 
    Google Scholar
53. Nawrocki, E. P., Kolbe, D. L. & Eddy, S. R. Infernal 1.0: inference of RNA alignments. *Bioinformatics* **25**, 1335–1337 (2009).

    Article 
    CAS 
    Google Scholar
54. McCarthy, E. M. & McDonald, J. F. LTR\_STRUC: a novel search and identification program for LTR retrotransposons. *Bioinformatics* **19**, 362–367 (2003).

    Article 
    CAS 
    Google Scholar
55. Ma, J., Devos, K. M. & Bennetzen, J. L. Analyses of LTR-retrotransposon structures reveal recent and rapid genomic DNA loss in rice. *Genome Res.* **14**, 860–869 (2004).

    Article 
    CAS 
    Google Scholar
56. Holligan, D., Zhang, X., Jiang, N., Pritham, E. J. & Wessler, S. R. The transposable element landscape of the model legume *Lotus japonicus*. *Genetics* **174**, 2215–2228 (2006).

    Article 
    CAS 
    Google Scholar
57. Yang, L. & Bennetzen, J. L. Structure-based discovery and description of plant and animal Helitrons. *Proc. Natl Acad. Sci. USA* **106**, 12832–12837 (2009).

    Article 
    CAS 
    ADS 
    Google Scholar
58. Wicker, T. et al. A unified classification system for eukaryotic transposable elements. *Nat. Rev. Genet.* **8**, 973–982 (2007).

    Article 
    CAS 
    Google Scholar
59. Smit, A., Hubley, R. & Green, P. RepeatMasker. http://www.repeatmasker.org.
60. Li, L., Stoeckert, C. J. Jr & Roos, D. S. OrthoMCL: identification of ortholog groups for eukaryotic genomes. *Genome Res.* **13**, 2178–2189 (2003).

    Article 
    CAS 
    Google Scholar
61. Larkin, M. A. et al. Clustal W and Clustal X version 2.0. *Bioinformatics* **23**, 2947–2948 (2007).

    Article 
    CAS 
    Google Scholar
62. Tamura, K. et al. MEGA5: molecular evolutionary genetics analysis using maximum likelihood, evolutionary distance, and maximum parsimony methods. *Mol. Biol. Evol.* **28**, 2731–2739 (2011).

    Article 
    CAS 
    Google Scholar
63. Guindon, S., Delsuc, F., Dufayard, J. F. & Gascuel, O. Estimating maximum likelihood phylogenies with PhyML. *Methods Mol. Biol.* **537**, 113–137 (2009).

    Article 
    CAS 
    Google Scholar
64. Trapnell, C. et al. Differential gene and transcript expression analysis of RNA-seq experiments with TopHat and Cufflinks. *Nat. Protoc.* **7**, 562–578 (2012).

    Article 
    CAS 
    Google Scholar
65. Roulin, A. et al. The fate of duplicated genes in a polyploid plant genome. *Plant J.* **73**, 143–153 (2012).

    Article 
    Google Scholar
66. Gu, K., Ng, H. K., Tang, M. L. & Schucany, W. R. Testing the ratio of two poisson rates. *Biom. J.* **50**, 283–298 (2008).

    Article 
    MathSciNet 
    Google Scholar
67. Benjamini, Y. & Hochberg, Y. Controlling the false discovery rate: a practical and powerful approach to multiple testing. *J. Roy. Statist. Soc. Ser.* **57**, 289–300 (1995).

    MathSciNet 
    MATH 
    Google Scholar
68. Kimura, M. A simple method for estimating evolutionary rates of base substitutions through comparative studies of nucleotide sequences. *J. Mol. Evol.* **16**, 111–120 (1980).

    Article 
    CAS 
    ADS 
    Google Scholar
69. Tamura, K., Dudley, J., Nei, M. & Kumar, S. MEGA4: Molecular Evolutionary Genetics Analysis (MEGA) software version 4.0. *Mol. Biol. Evol.* **24**, 1596–1599 (2007).

    Article 
    CAS 
    Google Scholar

Download references

## Acknowledgements

This work was supported by the National Basic Research Program of China (2011CB109300, 2012CB113906, 2012CB723007 and 2006CB101600), the National Natural Science Foundation of China (3067134, 30671119 and 31301039), the National High Technology Research and Development Program (2013AA102602, 2012AA100105 and 2012AA100104), the China Agriculture Research System (CARS-13 and CARS-25-A), the Core Research Budget of the Non-profit Governmental Research Institution (1610172010005), the Special Fund for Agro-scientific Research in the Public Interest (201103016), China–Australia collaboration project (2010DFA31730), UK Biotechnology and Biological Sciences Research Council (BB/E017363/1), the Australian Research Council (LP0882095, LP0883462, DP0985953 and LP110100200), the Next-Generation BioGreen 21 Program (PJ008944 and PJ008202), and the US National Science Foundation (IOS 0638418, DBI 0849896, MCB 1021718).

## Author information

Author notes

1. Shengyi Liu, Yumei Liu, Xinhua Yang, Chaobo Tong, David Edwards and Isobel A. P. Parkin: These are joint first authors

### Authors and Affiliations

1. The Key Laboratory of Biology and Genetic Improvement of Oil Crops, The Ministry of Agriculture of PRC, Oil Crops Research Institute, Chinese Academy of Agricultural Sciences, Wuhan, 430062, China

   Shengyi Liu, Chaobo Tong, Meixia Zhao, Jingyin Yu, Shunmou Huang, Qiong Hu, Xinfa Wang, Caihua Dong, Zhiyong Hu, Yi Huang, Junyan Huang, Jiaqin Shi, Desheng Mei, Jing Liu & Wei Hua
2. The Key Laboratory of Biology and Genetic Improvement of Horticultural Crops, The Ministry of Agriculture, Institute of Vegetables and Flowers, Chinese Academy of Agricultural Sciences, Beijing, 10081, China

   Yumei Liu, Zhiyuan Fang, Jian Wu, Wanxin Wang, Limei Yang, Feng Cheng, Mu Zhuang, Yangyong Zhang & Xiaowu Wang
3. Beijing Genome Institute-Shenzhen, Shenzhen, 518083, China

   Xinhua Yang, Junyi Wang, Zhen Yue, Linfeng Yang, Qing Zhou, Changxin Lu, Zhangyan Wu, Zhuo Wang, Shengkai Pan, Jiumeng Min, Wanshun Li, Yin Huang, Wenbin Liu, Xun Xu, Xinming Liang & Jun Wang
4. Australian Centre for Plant Functional Genomics, School of Agriculture and Food Sciences, University of Queensland, Brisbane, 4072, Queensland, Australia

   David Edwards & Pradeep Ruperao
5. Agriculture and Agri-Food Canada, Saskatoon, S7N OX2, Saskatchewan, Canada

   Isobel A. P. Parkin
6. Department of Agronomy, Purdue University, WSLR Building B018, West Lafayette, 47907, Indiana, USA

   Meixia Zhao & Jianxin Ma
7. Plant Genome Mapping Laboratory, University of Georgia, Athens, 30605, Georgia, USA

   Xiyin Wang, Hui Guo, Dong Zhang, Jingping Li, Tae-Ho Lee, Huizhe Jin, Xu Tang, Yupeng Wang & Andrew H Paterson
8. Center for Genomics and Computational Biology, School of Life Sciences, and School of Sciences, Hebei United University, Tangshan, 063000, China

   Xiyin Wang, Dianchuan Jin, Li Wang & Jinpeng Wang
9. College of Agronomy and Biotechnology, Southwest University, BeiBei District, Chongqing, 400715, China

   Kun Lu & Jiana Li
10. Department of Biology, Centre for Novel Agricultural Products (CNAP), University of York, Wentworth Way, Heslington, YO10 5DD, York, UK

    Ian Bancroft
11. Department of Plant Sciences, Plant Genomics and Breeding Institute and Research Institute for Agriculture and Life Sciences, College of Agriculture & Life Sciences, Seoul National University, Seoul, 151-921, Republic of Korea

    Tae-Jin Yang, Perumal Sampath, Nomar Espinosa Waminal & Jonghoon Lee
12. Sichuan Academy of Agricultural Sciences, Chengdu, 610066, China

    Haojie Li & Liangcai Jiang
13. Southern Cross Plant Science, Southern Cross University, Lismore, 2480, New South Wales, Australia

    Graham J King
14. Bond Life Sciences Center, University of Missouri, Columbia, 65211-7310, Missouri, USA

    J. Chris Pires
15. Organization and Evolution of Plant Genomes, Unité de Recherche en Génomique Végétale, Unité Mixte de Recherche 1165 (Institut National de Recherche Agronomique, Centre National de la Recherche Scientifique, Université Evry Val d’Essonne), Evry, 91057, France

    Harry Belcram & Boulos Chalhoub
16. National Key Laboratory of Crop Genetic Improvement, Huazhong Agricultural University, Wuhan, 430070, China

    Jinxing Tu, Zaiyun Li & Yongming Zhou
17. College of Agronomy, Hunan Agricultural University, Changsha, 410128, China

    Mei Guan, Xun Li & Zhongsong Liu
18. Jiangsu Academy of Agricultural Sciences, Nanjing, 210014, China

    Cunkou Qi & Jiefu Zhang
19. Qinghai Academy of Agriculture and Forestry Sciences, National Key Laboratory Breeding Base for Innovation and Utilization of Plateau Crop Germplasm, Xining, 810016, China

    Dezhi Du & Lu Xiao
20. Australian Research Council Centre of Excellence for Integrative Legume Research, University of Queensland, Brisbane, 4072, Queensland, Australia

    Jacqueline Batley
21. National Research Council Canada, Saskatoon, S7N 0W9, Saskatchewan, Canada

    Andrew G Sharpe
22. The Agricultural Genome Center, National Academy of Agricultural Science, RDA, 126 Suin-Ro, Suwon, 441-707, Republic of Korea

    Beom-Seok Park
23. Department of Life Science, Plant Biotechnology Institute, Sahmyook University, Seoul, 139-742, Republic of Korea

    Nomar Espinosa Waminal & Hyun Hee Kim
24. School of Life Sciences, South-Central University for Nationality, Wuhan, 430074, China

    Xuequn Liu & Rui Qin
25. Commissariat à l'Energie Atomique (CEA), Genoscope, Institut de Génomique, BP5706, Evry 91057, France

    France Denoeud
26. Centre National de Recherche Scientifique (CNRS), Université d'Evry, UMR 8030, CP5706, Evry 91057, France

    France Denoeud
27. Department of Biology, University of Copenhagen, Ole Maaløes Vej 5, 2200, Copenhagen, Denmark

    Jun Wang
28. King Abdulaziz University, Jeddah, 21589, Saudi Arabia

    Jun Wang
29. Department of Medicine and State Key Laboratory of Pharmaceutical Biotechnology, University of Hong Kong, 21 Sassoon Road, Hong Kong

    Jun Wang

Authors

1. Shengyi Liu

   View author publications

   You can also search for this author in
   PubMed Google Scholar
2. Yumei Liu

   View author publications

   You can also search for this author in
   PubMed Google Scholar
3. Xinhua Yang

   View author publications

   You can also search for this author in
   PubMed Google Scholar
4. Chaobo Tong

   View author publications

   You can also search for this author in
   PubMed Google Scholar
5. David Edwards

   View author publications

   You can also search for this author in
   PubMed Google Scholar
6. Isobel A. P. Parkin

   View author publications

   You can also search for this author in
   PubMed Google Scholar
7. Meixia Zhao

   View author publications

   You can also search for this author in
   PubMed Google Scholar
8. Jianxin Ma

   View author publications

   You can also search for this author in
   PubMed Google Scholar
9. Jingyin Yu

   View author publications

   You can also search for this author in
   PubMed Google Scholar
10. Shunmou Huang

    View author publications

    You can also search for this author in
    PubMed Google Scholar
11. Xiyin Wang

    View author publications

    You can also search for this author in
    PubMed Google Scholar
12. Junyi Wang

    View author publications

    You can also search for this author in
    PubMed Google Scholar
13. Kun Lu

    View author publications

    You can also search for this author in
    PubMed Google Scholar
14. Zhiyuan Fang

    View author publications

    You can also search for this author in
    PubMed Google Scholar
15. Ian Bancroft

    View author publications

    You can also search for this author in
    PubMed Google Scholar
16. Tae-Jin Yang

    View author publications

    You can also search for this author in
    PubMed Google Scholar
17. Qiong Hu

    View author publications

    You can also search for this author in
    PubMed Google Scholar
18. Xinfa Wang

    View author publications

    You can also search for this author in
    PubMed Google Scholar
19. Zhen Yue

    View author publications

    You can also search for this author in
    PubMed Google Scholar
20. Haojie Li

    View author publications

    You can also search for this author in
    PubMed Google Scholar
21. Linfeng Yang

    View author publications

    You can also search for this author in
    PubMed Google Scholar
22. Jian Wu

    View author publications

    You can also search for this author in
    PubMed Google Scholar
23. Qing Zhou

    View author publications

    You can also search for this author in
    PubMed Google Scholar
24. Wanxin Wang

    View author publications

    You can also search for this author in
    PubMed Google Scholar
25. Graham J King

    View author publications

    You can also search for this author in
    PubMed Google Scholar
26. J. Chris Pires

    View author publications

    You can also search for this author in
    PubMed Google Scholar
27. Changxin Lu

    View author publications

    You can also search for this author in
    PubMed Google Scholar
28. Zhangyan Wu

    View author publications

    You can also search for this author in
    PubMed Google Scholar
29. Perumal Sampath

    View author publications

    You can also search for this author in
    PubMed Google Scholar
30. Zhuo Wang

    View author publications

    You can also search for this author in
    PubMed Google Scholar
31. Hui Guo

    View author publications

    You can also search for this author in
    PubMed Google Scholar
32. Shengkai Pan

    View author publications

    You can also search for this author in
    PubMed Google Scholar
33. Limei Yang

    View author publications

    You can also search for this author in
    PubMed Google Scholar
34. Jiumeng Min

    View author publications

    You can also search for this author in
    PubMed Google Scholar
35. Dong Zhang

    View author publications

    You can also search for this author in
    PubMed Google Scholar
36. Dianchuan Jin

    View author publications

    You can also search for this author in
    PubMed Google Scholar
37. Wanshun Li

    View author publications

    You can also search for this author in
    PubMed Google Scholar
38. Harry Belcram

    View author publications

    You can also search for this author in
    PubMed Google Scholar
39. Jinxing Tu

    View author publications

    You can also search for this author in
    PubMed Google Scholar
40. Mei Guan

    View author publications

    You can also search for this author in
    PubMed Google Scholar
41. Cunkou Qi

    View author publications

    You can also search for this author in
    PubMed Google Scholar
42. Dezhi Du

    View author publications

    You can also search for this author in
    PubMed Google Scholar
43. Jiana Li

    View author publications

    You can also search for this author in
    PubMed Google Scholar
44. Liangcai Jiang

    View author publications

    You can also search for this author in
    PubMed Google Scholar
45. Jacqueline Batley

    View author publications

    You can also search for this author in
    PubMed Google Scholar
46. Andrew G Sharpe

    View author publications

    You can also search for this author in
    PubMed Google Scholar
47. Beom-Seok Park

    View author publications

    You can also search for this author in
    PubMed Google Scholar
48. Pradeep Ruperao

    View author publications

    You can also search for this author in
    PubMed Google Scholar
49. Feng Cheng

    View author publications

    You can also search for this author in
    PubMed Google Scholar
50. Nomar Espinosa Waminal

    View author publications

    You can also search for this author in
    PubMed Google Scholar
51. Yin Huang

    View author publications

    You can also search for this author in
    PubMed Google Scholar
52. Caihua Dong

    View author publications

    You can also search for this author in
    PubMed Google Scholar
53. Li Wang

    View author publications

    You can also search for this author in
    PubMed Google Scholar
54. Jingping Li

    View author publications

    You can also search for this author in
    PubMed Google Scholar
55. Zhiyong Hu

    View author publications

    You can also search for this author in
    PubMed Google Scholar
56. Mu Zhuang

    View author publications

    You can also search for this author in
    PubMed Google Scholar
57. Yi Huang

    View author publications

    You can also search for this author in
    PubMed Google Scholar
58. Junyan Huang

    View author publications

    You can also search for this author in
    PubMed Google Scholar
59. Jiaqin Shi

    View author publications

    You can also search for this author in
    PubMed Google Scholar
60. Desheng Mei

    View author publications

    You can also search for this author in
    PubMed Google Scholar
61. Jing Liu

    View author publications

    You can also search for this author in
    PubMed Google Scholar
62. Tae-Ho Lee

    View author publications

    You can also search for this author in
    PubMed Google Scholar
63. Jinpeng Wang

    View author publications

    You can also search for this author in
    PubMed Google Scholar
64. Huizhe Jin

    View author publications

    You can also search for this author in
    PubMed Google Scholar
65. Zaiyun Li

    View author publications

    You can also search for this author in
    PubMed Google Scholar
66. Xun Li

    View author publications

    You can also search for this author in
    PubMed Google Scholar
67. Jiefu Zhang

    View author publications

    You can also search for this author in
    PubMed Google Scholar
68. Lu Xiao

    View author publications

    You can also search for this author in
    PubMed Google Scholar
69. Yongming Zhou

    View author publications

    You can also search for this author in
    PubMed Google Scholar
70. Zhongsong Liu

    View author publications

    You can also search for this author in
    PubMed Google Scholar
71. Xuequn Liu

    View author publications

    You can also search for this author in
    PubMed Google Scholar
72. Rui Qin

    View author publications

    You can also search for this author in
    PubMed Google Scholar
73. Xu Tang

    View author publications

    You can also search for this author in
    PubMed Google Scholar
74. Wenbin Liu

    View author publications

    You can also search for this author in
    PubMed Google Scholar
75. Yupeng Wang

    View author publications

    You can also search for this author in
    PubMed Google Scholar
76. Yangyong Zhang

    View author publications

    You can also search for this author in
    PubMed Google Scholar
77. Jonghoon Lee

    View author publications

    You can also search for this author in
    PubMed Google Scholar
78. Hyun Hee Kim

    View author publications

    You can also search for this author in
    PubMed Google Scholar
79. France Denoeud

    View author publications

    You can also search for this author in
    PubMed Google Scholar
80. Xun Xu

    View author publications

    You can also search for this author in
    PubMed Google Scholar
81. Xinming Liang

    View author publications

    You can also search for this author in
    PubMed Google Scholar
82. Wei Hua

    View author publications

    You can also search for this author in
    PubMed Google Scholar
83. Xiaowu Wang

    View author publications

    You can also search for this author in
    PubMed Google Scholar
84. Jun Wang

    View author publications

    You can also search for this author in
    PubMed Google Scholar
85. Boulos Chalhoub

    View author publications

    You can also search for this author in
    PubMed Google Scholar
86. Andrew H Paterson

    View author publications

    You can also search for this author in
    PubMed Google Scholar

### Contributions

I.B., B.C., D.E., Q.H., W.H., G.J.K., S.L., Y.L., J. Ma, A.H.P., J.C.P., I.A.P.P., JunW., XiaowuW., XiyinW. and T.-J.Y. are principal investigators (alphabetic order). B.C., W.H., A.H.P., JunW. and XiaowuW. are equally contributing senior authors. S.L., J.W., W.H., X.X. and Z.Y. planned and managed the project. S.L., C.T., A.H.P. and D.E., X.Y. and M.Z. wrote this manuscript and I.B., J. Ma., G.J.K., J.C.P., B.C., T.-J.Y., I.A.P.P., XiyinW., XiaowuW., K.L., Y.L., J.B. and A.G.S. made revision or edits or comments. J.W. (leader), W.H. (co-leader), JunW., L.Y., and Z.Y. performed DNA sequencing. L.Y. (leader), W.H. (co-leader), S.H., J.W., S.L. and J.Y. conducted genomic sequence assembly. S.H. (leader), XiyinW. (co-leader), J.Min, I.B., W.H., J.B., D.E., P.R., S.L., J.S., Y.L. and W.W. conducted scaffold anchoring to linkage maps and assembly validation. X.Y. (leader), J.Y. (co-leader), S.L., Q.Z., S.H. and J. Min performed annotation. C.T. (leader), Wanshun L., W.H., Y.L., C.L., W.W., J. Wu, S.L., C.D. and M.Z. performed transcriptome sequencing. S.L. conceived analysis of comparison and evolution. S.L. (leader), C.T., X.Y., ZhangyanW., C.L., S.H., J. Ma, J.Y., M.Z., Zhuo W., Q.Z., S.P., I.A.P.P., A.G.S., L.Y., I.B., G.J.K., J.C.P., XiaowuW., B.C., F.C., YinH., WenbinL. and X.Liang performed analysis of comparative genomics and evolution. J. Ma (leader), M.Z., Q.Z., C.T., S.L., B.C., S.H., H.B., C.L. and JianaL. conducted TE analysis. XiyinW. (leader), J.Y., T.-J.Y., ZhangyanW., L.W., J. Li, T.-H.L., JinpengW., H.J., X.T., X.L., M.G. and L.J. conducted gene family analysis. K.L. (leader), J.Y., S.L., C.T., H.L., H.G., S.P., D.Z., Z.F., Q.H., Xnfa W., C.Q., D.D., Z.H., Y.H., J.H., D.M., J.L., Z. Li, J.Z., L.X., Y.Zhou., Z.L. and Y.Zhang conducted trait-related gene analysis. A.H.P. (leader), XiyinW., D.J., Y.W. and T.-H.L. conducted gene conversion analysis. T.-J. Y. (leader), M.Z., P.S., B.-S.P., J.Ma, N.E.W., R.Q., X.L., J.Lee and H.H.K. conducted centromere analysis. C.T. (leader), S.L., X.Y., S.H., C.L., Zhangyan W., Q.Z., J.Y., J.T. and J.B. conducted tandemly duplicated gene analysis. ZhangyanW. and J.Y. performed data submission.

### Corresponding author

Correspondence to
Shengyi Liu.

## Ethics declarations

### Competing interests

The authors declare no competing financial interests.

## Supplementary information

### Supplementary Figures, Tables, Methods and References

Supplementary Figures 1-68, Supplementary Tables 1-49, Supplementary Methods and Supplementary References (PDF 12359 kb)

### Supplementary Data 1

The 23,823 *Brassica oleracea-B. rapa* orthologous gene pairs and those with different exon numbers (XLS 3106 kb)

### Supplementary Data 2

The genes for biosynthesis and breakdown of glucosinolates (GSL) in *B. rapa* and *B. oleracea*. (XLS 36 kb)

### Supplementary Data 3

The multiple sequence alignment of gene families corresponding to Figure 5 and Supplementary Figures 46-61. (XLS 9526 kb)

## Rights and permissions

This work is licensed under a Creative Commons Attribution-NonCommercial-ShareAlike 3.0 Unported License. The images or other third party material in this article are included in the article’s Creative Commons license, unless indicated otherwise in the credit line; if the material is not included under the Creative Commons license, users will need to obtain permission from the license holder to reproduce the material. To view a copy of this license, visit http://creativecommons.org/licenses/by-nc-sa/3.0/

Reprints and permissions

## About this article

### Cite this article

Liu, S., Liu, Y., Yang, X. *et al.* The *Brassica oleracea* genome reveals the asymmetrical evolution of polyploid genomes.
*Nat Commun* **5**, 3930 (2014). https://doi.org/10.1038/ncomms4930

Download citation

- Received: 23 October 2013
- Accepted: 22 April 2014
- Published: 23 May 2014
- DOI: https://doi.org/10.1038/ncomms4930

### Share this article

Anyone you share the following link with will be able to read this content:

Get shareable link

Sorry, a shareable link is not currently available for this article.

Copy to clipboard

Provided by the Springer Nature SharedIt content-sharing initiative

## This article is cited by

- ### Large-scale gene expression alterations introduced by structural variation drive morphotype diversification in Brassica oleracea

  - Xing Li
  - Yong Wang
  - Feng Cheng

  *Nature Genetics* (2024)
- ### Macroevolutionary dynamics of gene family gain and loss along multicellular eukaryotic lineages

  - Mirjana Domazet-Lošo
  - Tin Široki
  - Tomislav Domazet-Lošo

  *Nature Communications* (2024)
- ### Genomic insights into biased allele loss and increased gene numbers after genome duplication in autotetraploid Cyclocarya paliurus

  - Rui-Min Yu
  - Ning Zhang
  - Wei-Ning Bai

  *BMC Biology* (2023)
- ### Functional and evolutionary study of MLO gene family in the regulation of Sclerotinia stem rot resistance in Brassica napus L.

  - Jie Liu
  - Yupo Wu
  - Shengyi Liu

  *Biotechnology for Biofuels and Bioproducts* (2023)
- ### Different evolutionary patterns of TIR1/AFBs and AUX/IAAs and their implications for the morphogenesis of land plants

  - Liyao Su
  - Tian Zhang
  - Zong-Ming Cheng

  *BMC Plant Biology* (2023)

## Comments

By submitting a comment you agree to abide by our Terms and Community Guidelines. If you find something abusive or that does not comply with our terms or guidelines please flag it as inappropriate.


Download PDF

Advertisement

## Explore content

- Research articles
- Reviews & Analysis
- News & Comment
- Videos
- Collections
- Subjects

- Follow us on Facebook
- Follow us on Twitter
- Sign up for alerts
- RSS feed


## About the journal

- Aims & Scope
- Editors
- Journal Information
- Open Access Fees and Funding
- Calls for Papers
- Editorial Values Statement
- Journal Metrics
- Editors' Highlights
- Contact
- Editorial policies
- Top Articles


## Publish with us

- For authors
- For Reviewers
- Language editing services
- Submit manuscript

## Search

Search articles by subject, keyword or author

Show results from

All journals
This journal

Search

Advanced search

### Quick links

- Explore articles by subject
- Find a job
- Guide to authors
- Editorial policies

Nature Communications (*Nat Commun*)

ISSN 2041-1723 (online)

## nature.com sitemap

### About Nature Portfolio

- About us
- Press releases
- Press office
- Contact us

### Discover content

- Journals A-Z
- Articles by subject
- protocols.io
- Nature Index

### Publishing policies

- Nature portfolio policies
- Open access

### Author & Researcher services

- Reprints & permissions
- Research data
- Language editing
- Scientific editing
- Nature Masterclasses
- Research Solutions

### Libraries & institutions

- Librarian service & tools
- Librarian portal
- Open research
- Recommend to library

### Advertising & partnerships

- Advertising
- Partnerships & Services
- Media kits
- Branded
  content

### Professional development

- Nature Careers
- Nature 
  Conferences

### Regional websites

- Nature Africa
- Nature China
- Nature India
- Nature Italy
- Nature Japan
- Nature Middle East

- Privacy
  Policy
- Use
  of cookies
- Your privacy choices/Manage cookies
- Legal
  notice
- Accessibility
  statement
- Terms & Conditions
- Your US state privacy rights

© 2024 Springer Nature Limited

xml version="1.0" encoding="UTF-8"?

Close banner

Close

Sign up for the *Nature Briefing* newsletter — what matters in science, free to your inbox daily.

Email address

Sign up

I agree my information will be processed in accordance with the *Nature* and Springer Nature Limited Privacy Policy.

Close banner

Close

Get the most important science stories of the day, free in your inbox.
Sign up for Nature Briefing
